# Supplementary material for: Deep learning-assisted SERS for detection of propoxate and isopropoxate in E-cigarettes
Source: Royal Society of Chemistry journal article supplement (doi:10.1039/d6ra00614k), 2026-05-22
Supplement: d6ra00614k1.pdf [file d6ra00614k1.pdf]

## Deep Learning-Assisted SERS for Detection of Propoxate and Isopropoxate in E-Cigarettes

Jiahao Teng <sup>a</sup>, Shenggang Huang <sup>a</sup>, Wenkai Zheng <sup>a</sup>, Xuqing Wang <sup>b</sup>, Yingsheng He <sup>c</sup>, Jiye Wang <sup>a\*</sup>, and Yazhou Qin <sup>a\*</sup>

Table S1 Calculation of the enhancement factor.

| Project                          | Isopropoxate                |
|----------------------------------|-----------------------------|
| $I_{RS}$ (solid-state)           | 267.15                      |
| $C_{RS}$                         | 4.26 mol/L                  |
| $I_{SERS}$ (1 $\mu\text{g/mL}$ ) | 35431.64                    |
| $C_{SERS}$                       | $3.87 \times 10^{-6}$ mol/L |

Def: EF is  $1.46 \times 10^8$ .

Table S2 Propoxate characteristic peak attribution.

| Propoxate                                                                   | SERS | DFT x 0.978 | Electronic cigarette |
|-----------------------------------------------------------------------------|------|-------------|----------------------|
| $\nu(\text{C}=\text{C}), \gamma(\text{C}-\text{H})$                         | 616  | 618         | 611                  |
| $\gamma(\text{C}-\text{H})$                                                 | 783  | 791         | 781                  |
| $\gamma(\text{C}-\text{H})$                                                 | 910  | 913         | 910                  |
| $\nu(\text{C}-\text{O})$                                                    | 1002 | 996         | 999                  |
| $\nu(\text{C}-\text{C})$                                                    | 1028 | 1034        | 1023                 |
| $\nu(\text{C}-\text{O}), \nu(\text{C}-\text{N}), \delta(\text{C}-\text{H})$ | 1196 | 1200        | 1194                 |
| $\nu(\text{C}=\text{C}), \gamma(\text{C}-\text{H})$                         | 1398 | 1400        | 1390                 |
| $\nu(\text{C}=\text{O})$                                                    | 1720 | 1750        | 1716                 |

Table S3 Isopropoxate characteristic peak attribution.

| Isopropoxate                          | SERS | DFT x 0.968 | Electronic cigarette |
|---------------------------------------|------|-------------|----------------------|
| $\delta(\text{C-H})$                  | 616  | 613         | 629                  |
| $\gamma(\text{C-H})$                  | 783  | 784         | 783                  |
| $\nu(\text{C-C})$                     | 844  | 885         | 846                  |
| $\nu(\text{C-C}), \gamma(\text{C-H})$ | 1002 | 986         | 985                  |
| $\delta(\text{C-H})$                  | 1028 | 1023        | 1027                 |
| $\rho(\text{C-H})$                    | 1196 | 1207        | 1192                 |
| $\nu(\text{C=C})$                     | 1720 | 1641        | 1668                 |

Def:  $\nu$ : stretching;  $\delta$ : in plane bending;  $\rho$ : rocking.  $\gamma$ : out of plane bending;  $\tau$ : twisting;  $\beta$ : ring breathing.

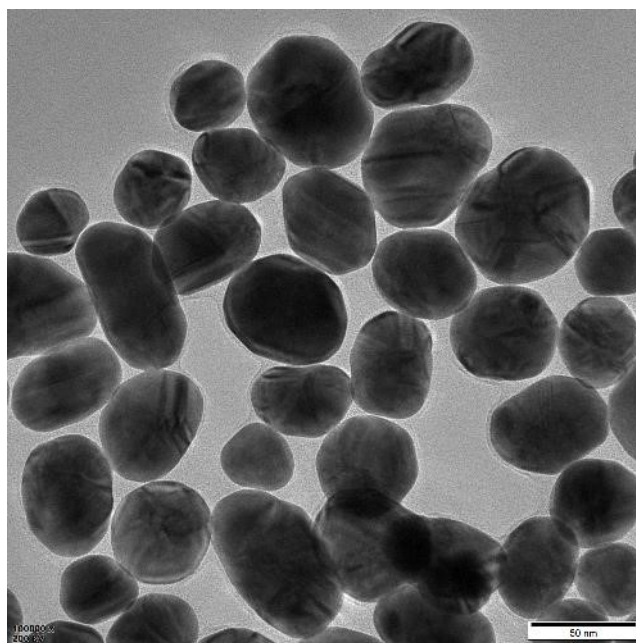

Figure S1 TEM image of AuNPs.

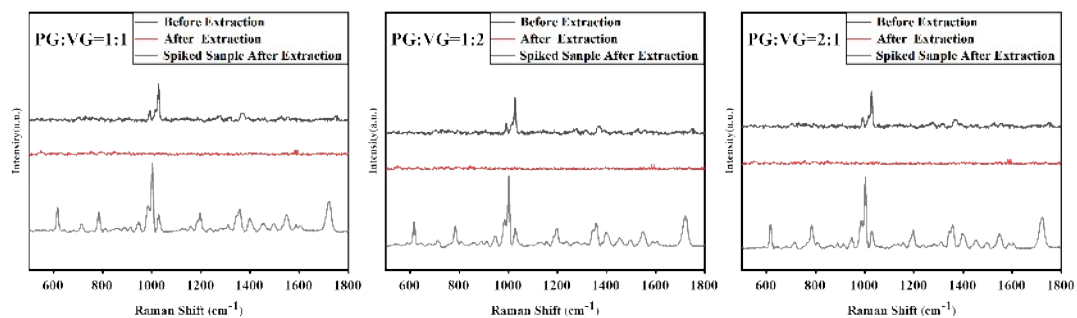

Figure S2 SERS detection results before and after pretreatment under different PG/VG ratios.

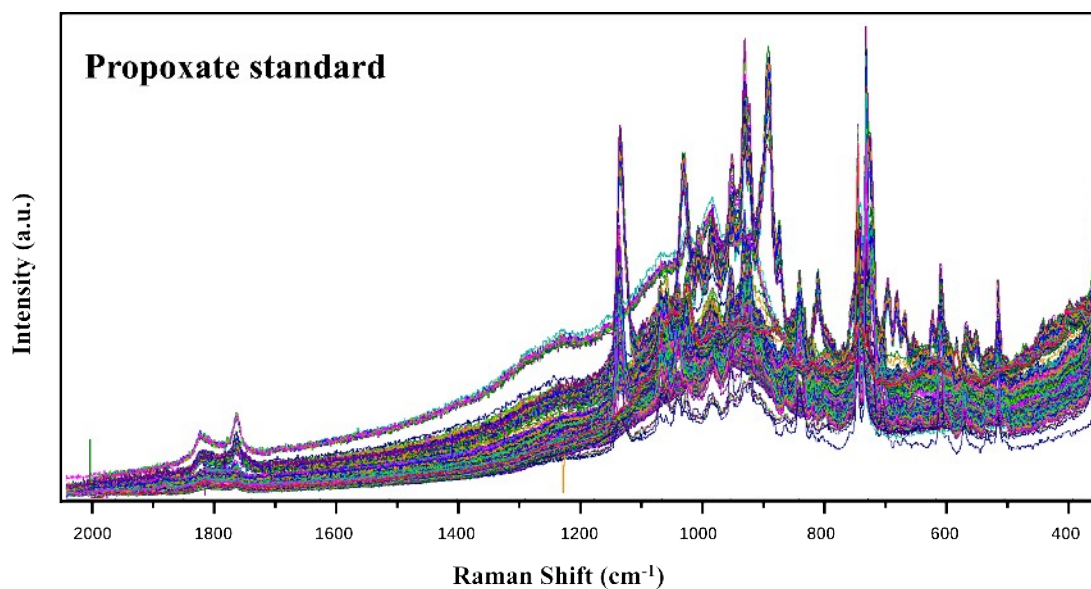

Figure S3 Original Spectral Data of Propoxate Standard.

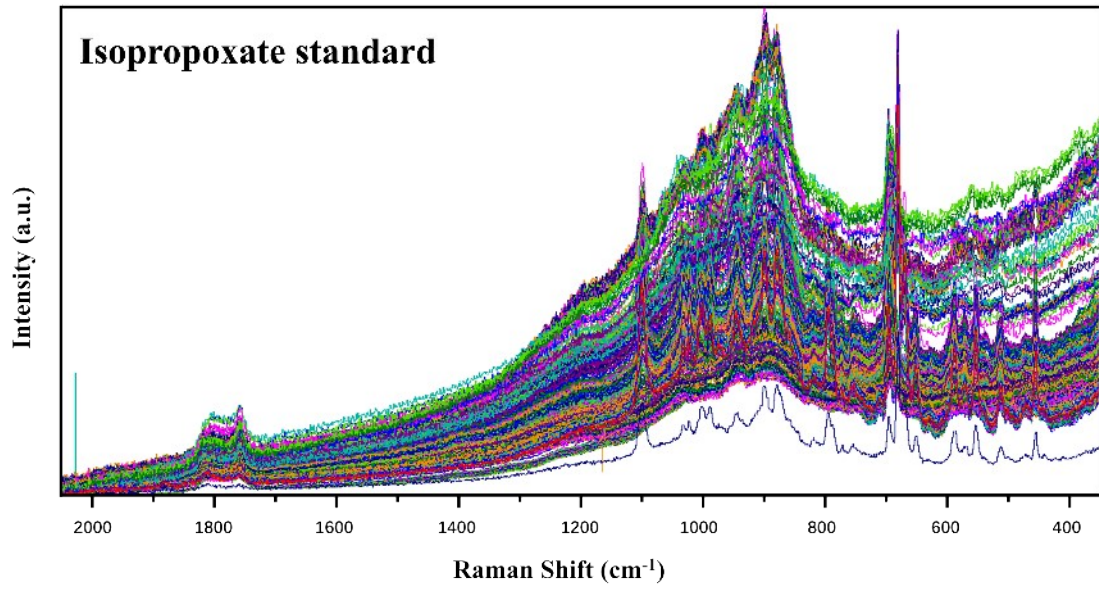

Figure S4 Original Spectral Data of Isopropoxate Standard.

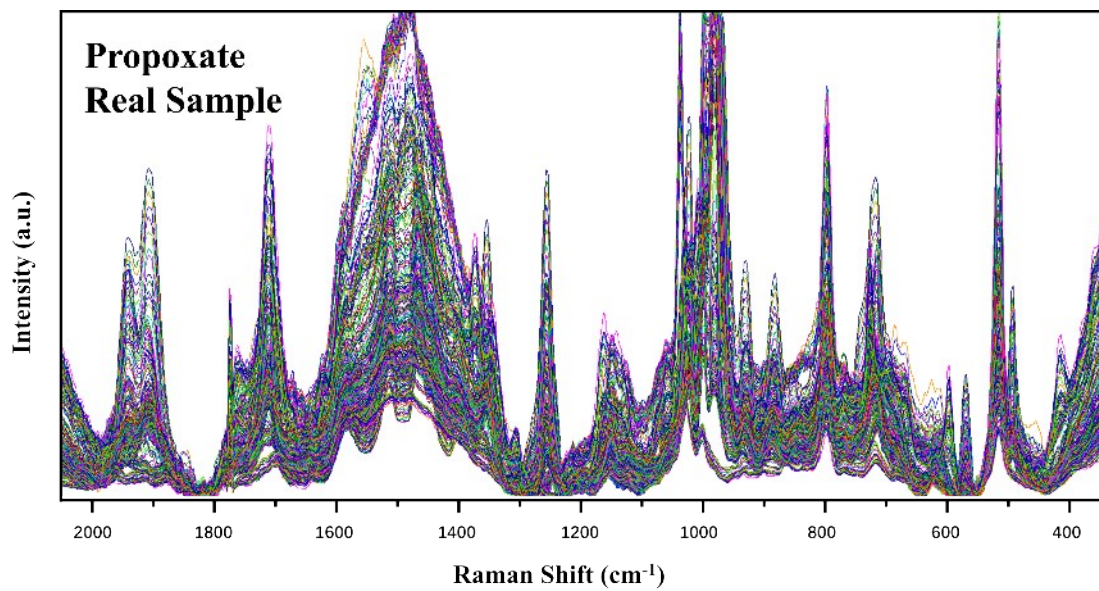

Figure S5 Original Spectral Data of Propoxate Real Sample.

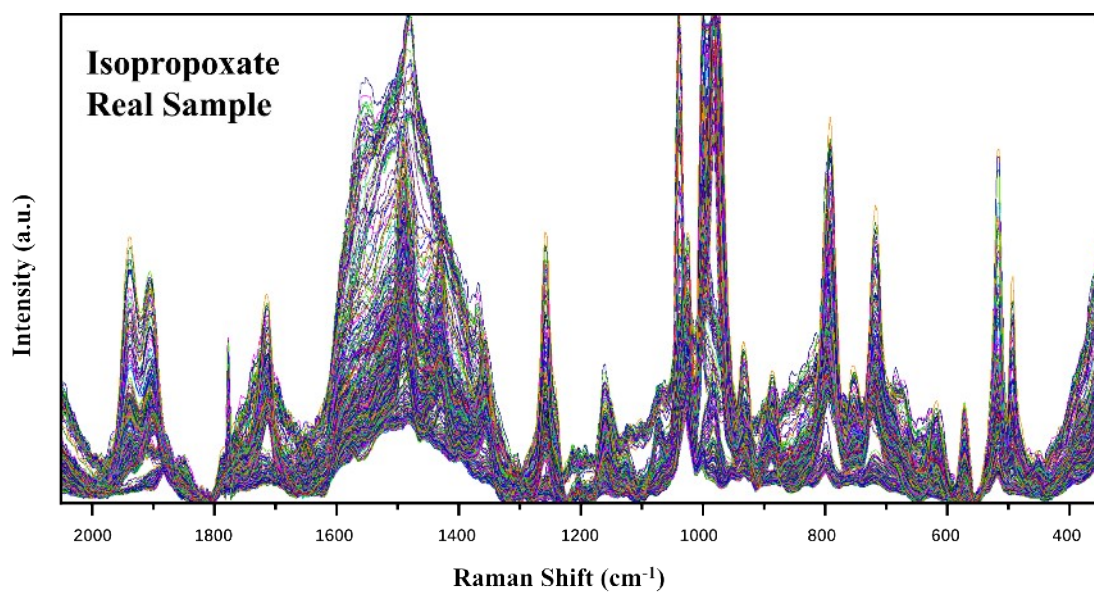

Figure S6 Original Spectral Data of Isopropoxate Real Sample.
